# Supplementary material
Source: PubMed Central journal article supplement (PMC3697563)
Supplement: AEM.00714-13_zam999104464so1.pdf [file AEM.00714-13_zam999104464so1.pdf]

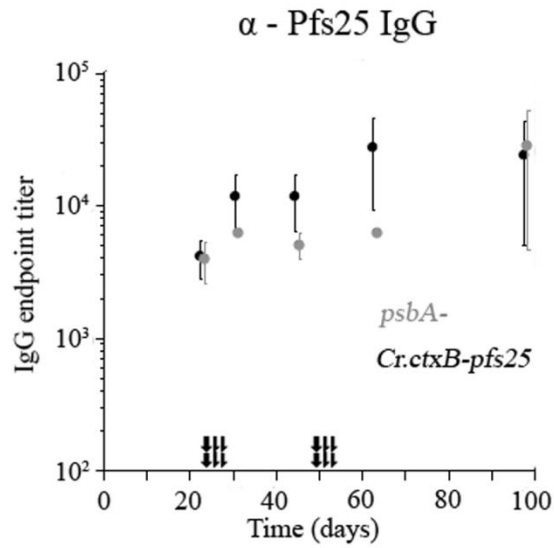

**Figure S1. Immune response of primed mice to oral immunization with whole-cell algae.** Mice were injected with Cr.Pfs25 using Alhydrogel followed by two 15-mg doses of JAG101 or  $\Delta psbA$  *C. reinhardtii* on days 23, 24, 25, 53, 54, and 55. Serum IgG antibodies for Pfs25 were detected by ELISA. Error bars indicate the standard error of the mean. Arrows indicate oral vaccination.
